# Supplementary material
Source: Springer Nature journal article supplement (https://www.springermedizin.de/resource/supplementary/12936_2013_2936_MOESM15_ESM.pdf/9544554)

(a) *Bloodmeal Seeking*

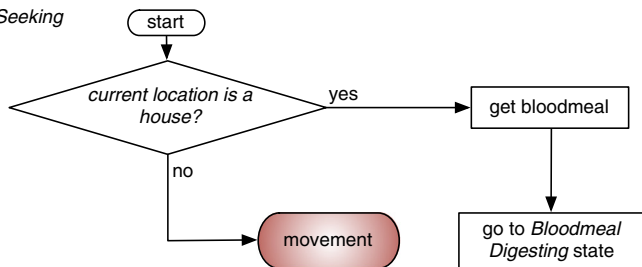

(b) *Gravid*

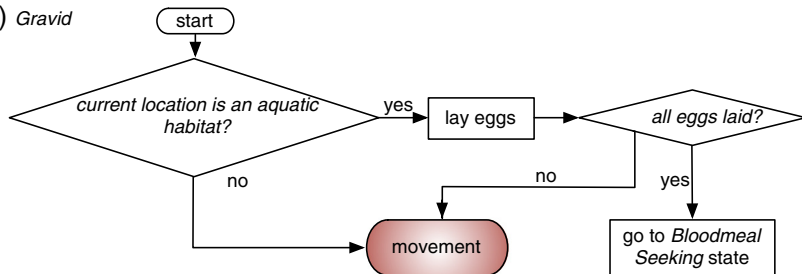

(c) *movement*

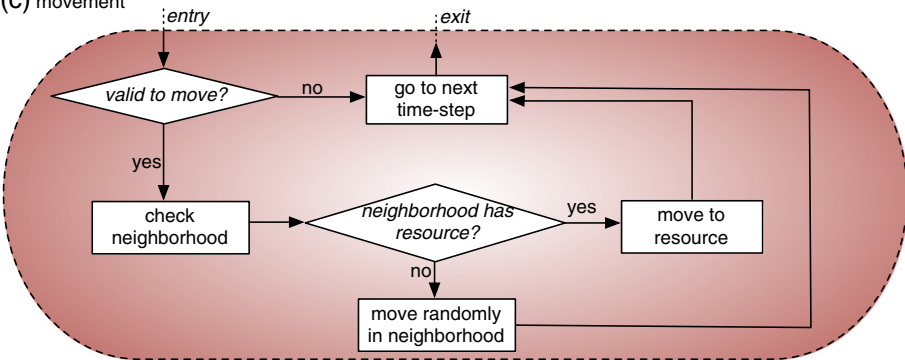

Supplement: MOESM15 [file 9544554]
